# Supplementary material for: A Br-triggered BiVO4 photoanode surface for efficient solar water splitting
Source: Royal Society of Chemistry journal article supplement (doi:10.1039/d4nj02232g), 2024-01-01
Supplement: d4nj02232g1.pdf [file d4nj02232g1.pdf]

1 **Br-triggered BiVO<sub>4</sub> photoanode surface for efficient solar**  
2 **water splitting**

3 Yuhong Wang<sup>a,\*</sup>, Qingqing Cheng<sup>a</sup>, Weijie Cheng<sup>a</sup>, Shaoqing Guo<sup>a,\*</sup>, Honghong  
4 Zhao<sup>b,\*</sup>, Lizhen Gao<sup>c,d</sup>

5 <sup>a</sup>School of Environment and Resource, Taiyuan University of Science and Technology,  
6 Taiyuan 030024, P. R. China.

7 E-mail: wangyuhong@tyust.edu.cn

8 E-mail: guosq@tyust.edu.cn

9 <sup>b</sup>School of Materials Science and Engineering, North University of China, Taiyuan  
10 030051, PR China

11 E-mail: honghongzhao@nuc.edu.cn

12 <sup>c</sup>College of Environmental Science and Engineering, Taiyuan University of  
13 Technology, Taiyuan 030024, P. R. China.

14 <sup>d</sup>School of Mechanical Engineering, University of Western Australia, 35 Stirling  
15 Highway, WA 6009, Australia.

1 **Equations used in this work<sup>[1]</sup>:**

2 1. Calculation of applied bias photon-to-current efficiency (ABPE):

$$3 \quad ABPE = \frac{J_{PEC} \times (1.23 - V_{app})}{P_{light}} \quad (S1)$$

4  $J_{PEC}$  (mA·cm<sup>-2</sup>) is the measured photocurrent density;  $V_{app}$  (V) is the applied external  
5 potential vs. RHE and  $P_{light}$  (100mW·cm<sup>-2</sup>) is the power density of the illumination.

6

7 2. Calculation of incident-photon-to-current conversion efficiency (IPCE):

$$8 \quad IPCE = \frac{J_{\lambda} \times 1240}{\lambda \times P_{\lambda}} \quad (S2)$$

9  $J_{\lambda}$  (mA·cm<sup>-2</sup>) is the photocurrent density measured under monochromatic illumination  
10 at  $\lambda$ ;  $P_{\lambda}$  (mW·cm<sup>-2</sup>) is the power intensity of the incident monochromatic light at  
11 wavelength  $\lambda$ ; the value of 1240 (V·nm) is calculated from the equation of  $hc/e$ , where  
12  $e$  is the charges of one electron ( $1.6 \times 10^{-19}$  C);  $h$  is Planck's constant ( $6.63 \times 10^{-34}$ J·s)  
13 and  $c$  is the speed of light ( $3 \times 10^8$  m·s<sup>-1</sup>).

14

15 3. Calculation of surface charges transfer efficiency ( $\eta_{CTE}$ ):

$$16 \quad \eta_{CTE} = \frac{J_{PEC}}{J_{scavenger}} \quad (S3)$$

17  $J_{scavenger}$  (mA·cm<sup>-2</sup>) and  $J_{PEC}$  (mA·cm<sup>-2</sup>) are the measured photocurrent density in a 0.01  
18 M sodium borate buffer solution (pH = 7.4) with and without 0.5 M Na<sub>2</sub>SO<sub>3</sub>.

19

20 4. Calculation of charges separation efficiency ( $\eta_{CSE}$ ):

$$\eta_{CSE} = \frac{J_{scavenger}}{J_{abs}} \quad (S4)$$

1  
2  $J_{scavenger}$  is the measured photocurrent density in a 0.01 M sodium borate buffer solution  
3 (pH = 7.4) with 0.5 M  $\text{Na}_2\text{SO}_3$  as a holessss scavenger.

4 5. The charges-transfer time ( $\tau$ ) of the films was calculated according to the equation<sup>[2]</sup>:

$$\tau = 1/2\pi f \quad (S5)$$

6 where  $f$  is the minimum frequency of the imaginary components

7  
8 Calculation detail:

9 The calculations were conducted within the framework of DFT as implemented in  
10 the plane wave set Vienna ab initio Simulation Package (VASP) code<sup>[3]</sup>.The  
11 generalized gradient approximation with the Perdew–Burke–Ernzerhof functional was  
12 employed to describe the exchange–correlation interaction<sup>[4]</sup>. In all calculations, the van  
13 der Waals interaction was described by using the empirical correction in Grimme’s  
14 scheme, i.e., DFT+D3<sup>[5]</sup>. The cutoff energy of the plane wave basis set was 500 eV.  
15 The geometries were optimized until the energy and the force were converged to  $10^{-6}$   
16 eV and  $0.001 \text{ eV } \text{\AA}^{-1}$ , respectively. All calculations were spin polarized throughout the  
17 calculations. The Brillouin zone was sampled by gamma point.

18 The overall OER could be written as

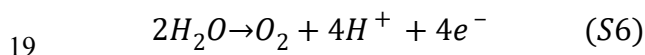

20 In our model, we assumed that the OER is processed in the four electrons pathway

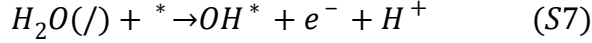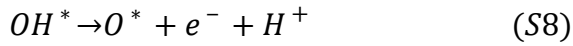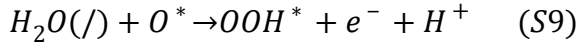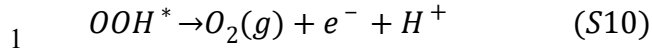

2 where \* refers to an active site on the catalyst, (l) and (g) represent liquid and gas  
3 phases, respectively. O\*, HO\*, and HOO\* are adsorbed intermediates. For each step the  
4 reaction free energy ( $\Delta G$ ) was defined as the difference between free energies of the  
5 initial and final states and was given by the expression<sup>[6]</sup>

$$6 \quad \Delta C = \Delta E + \Delta ZPE - T\Delta S + \Delta G_U + \Delta G_{ph} \quad (S11)$$

7 where  $\Delta E$ ,  $\Delta ZPE$ , and  $\Delta S$  were the different energy, zero-point energy, and entropy  
8 of the reaction, respectively. The  $\Delta E$  was obtained from DFT calculation, while the  
9  $\Delta ZPE$  and  $\Delta S$  were calculated from the values of Table 1 in a previous report<sup>[7]</sup>. The  
10  $\Delta G_U$  was defined as  $1/2\Delta G_{H_2}$  as suggested in the literature<sup>[7]</sup>.  $\Delta G_U = -eU$ , in which U  
11 is the potential related to the standard hydrogen electrode.  $\Delta G_{ph}$  is the correction free  
12 energy of OH<sup>-</sup> ions depended by the concentration ( $\Delta G_{ph} = -kT \ln 10 \times pH$ ).

13 The minimum potential for OER was obtained by

$$14 \quad U(OER) = \max\{\Delta G_{1a}, \Delta G_{1b}, \Delta G_{1c}, \Delta G_{1d}\} \quad (S12)$$

$$15 \quad \eta_{OER} = \frac{U(OER)}{e} - 1.23 \quad (S13)$$

16 in which,  $\Delta G_{1a}$ ,  $\Delta G_{1b}$ , and  $\Delta G_{1c}$  are the reaction free energy of Equations (S7)–  
17 (S10), when  $U = 0$  V,  $pH = 0$ .  $\eta_{OER}$  (V) refers to the overpotential required for OER.

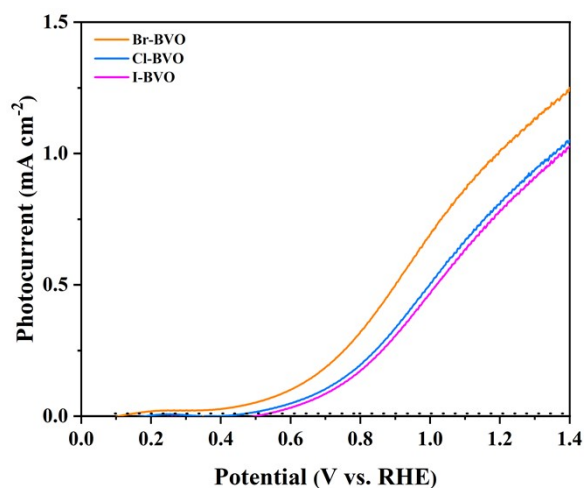

1

2 **Figure S1** LSV Curves of photoelectrochemical spitting water of BVO

3 photoanodes obtained at 0.5 M KBr/I/Cl for 2 h.

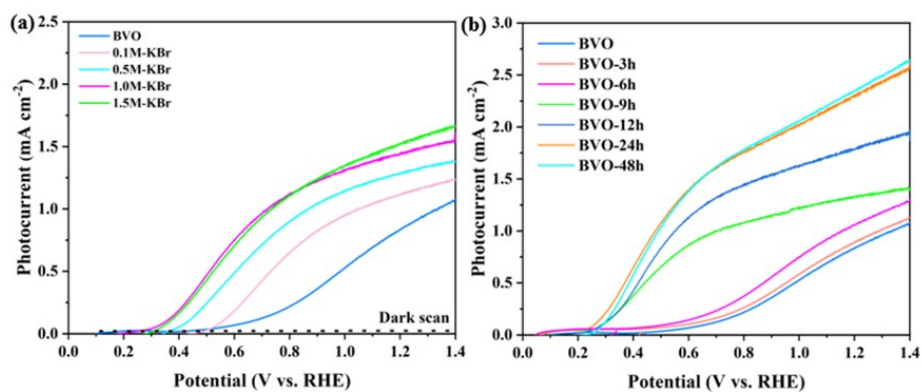

4

5

6 **Figure S2** LSV curves of photoelectrochemical spitting water of BVO

7 photoanodes obtained at (a) different concentration of KBr and (b) different post-

8 treatment time

9 **The optimal experimental conditions were described as follows:** Firstly, the BVO

10 photoanode was modified in 0.5 M KBr, KI and KCl solutions for the same time (2 h)

11 at room temperature. The linear sweep voltammetry (LSV) curves of

12 photoelectrochemical (PEC) water splitting indicated that the BVO photoanode

13 modified by KBr solution had significant PEC performance (**Fig. S1**). Then, the BVO

14 photoanode was modified for the same time (30 min) in different concentrations of KBr

1 solution. The modification effect on the BVO photoanode significantly increased with  
2 the rise of KBr concentration from 0.1 M to 1 M, as indicated by the LSV curves.  
3 However, the effect of 1 M and 1.5 M KBr on the BVO photoanode was similar (**Fig.**  
4 **S2a**). Therefore, the 1 M KBr solution had the optimal modification effect on the BVO  
5 photoanode. In addition, the BVO photoanode was post-treatment in 1 M KBr solution  
6 for different times (3,6,9,12,24,48 h) to study the effect of modification time on the  
7 PEC performance of BVO photoanode (**Fig. S2b**). With the increase of post-treatment  
8 modification time (3~24 h), the photocurrent of PEC water splitting gradually increased  
9 in the BVO photoanode. Nevertheless, the LSV curves of PEC water splitting were  
10 similar after post-treatment for 24 h and 48 h. Thus, the optimal post-treatment time  
11 was 24 h. The above trend of photocurrent change may be due to the fact that with the  
12 increase of post-treatment time, the coverage of the modified material on the surface of  
13 the BVO photoanode gradually increased, which induced a higher PEC water splitting  
14 photocurrent. After post-treatment for 24 h, the surface of the BVO photoanode was  
15 completely covered by the modified material. Although the subsequent modification  
16 time increased to 48 h, the coverage of the modified material on the surface of the BVO  
17 photoanode did not change, thus showing a similar LSV curve. Therefore, the optimal  
18 post-treatment condition of BVO photoanode is post-treatment for 24 h in 1 M KBr  
19 solution at room temperature.

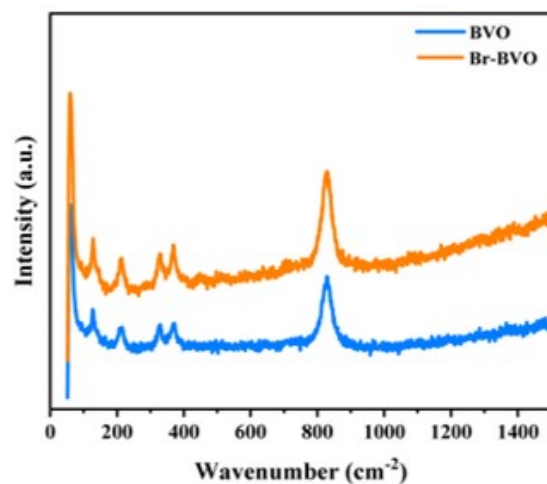

1

2

**Figure S3** Raman spectras of BVO and Br-BVO photoanode

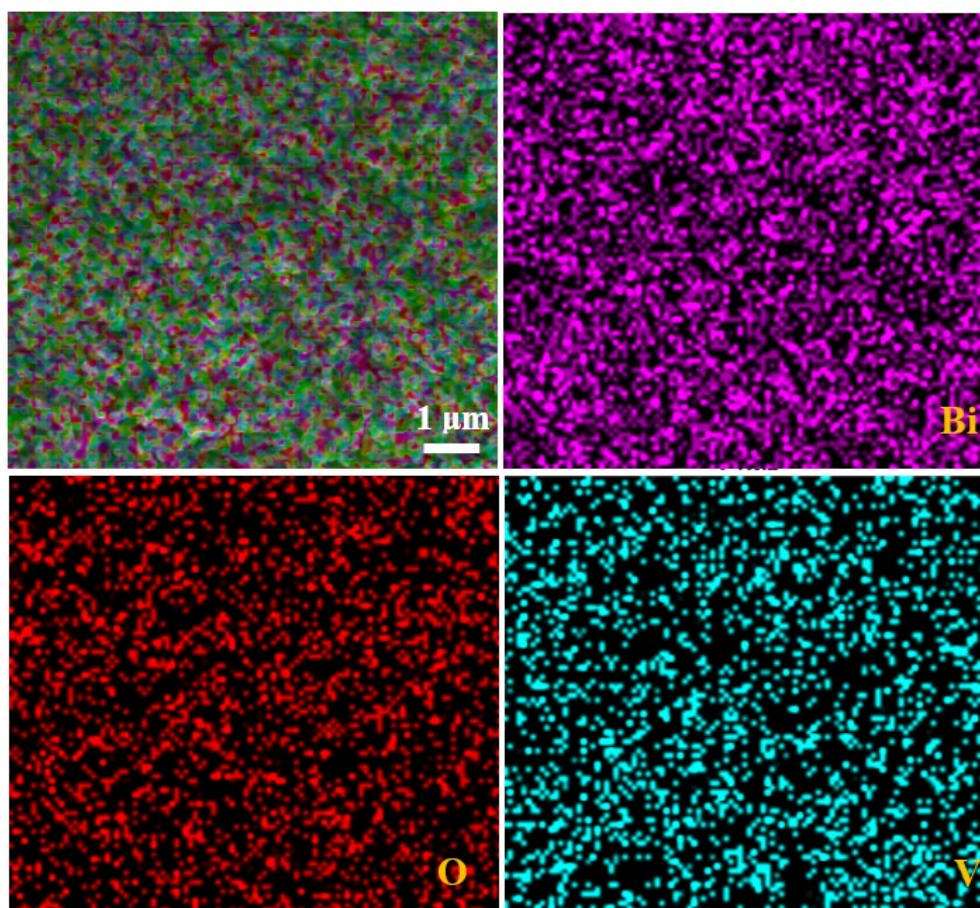

3

4 **Figure S4** SEM energy-dispersive X-ray spectra (EDS) spectra elemental

5 mapping of BiVO<sub>4</sub> photoanode.

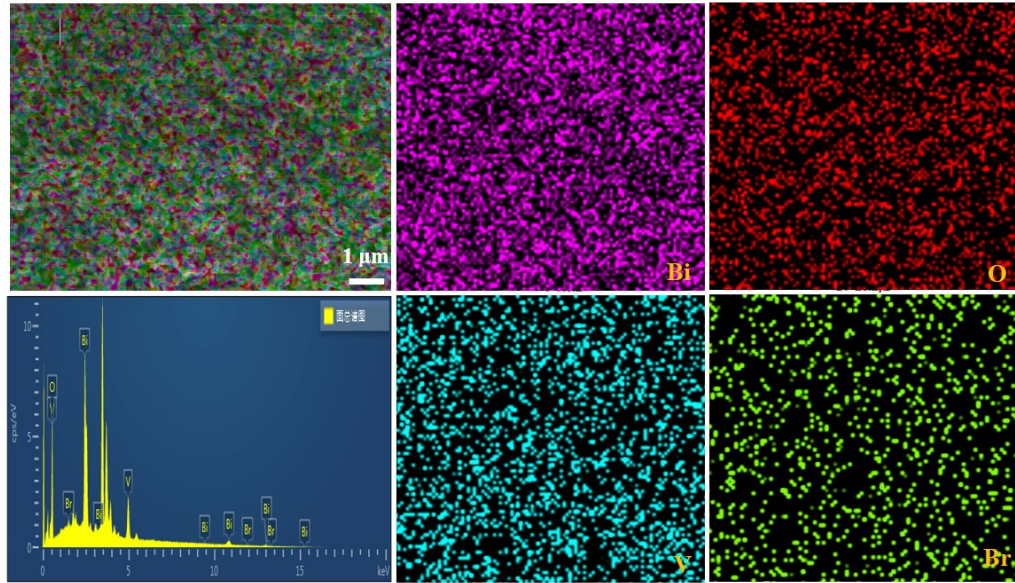

1

2 **Figure S5** SEM energy-dispersive X-ray spectra (EDS) spectra elemental  
 3 mapping of Br-BiVO<sub>4</sub> photoanode.

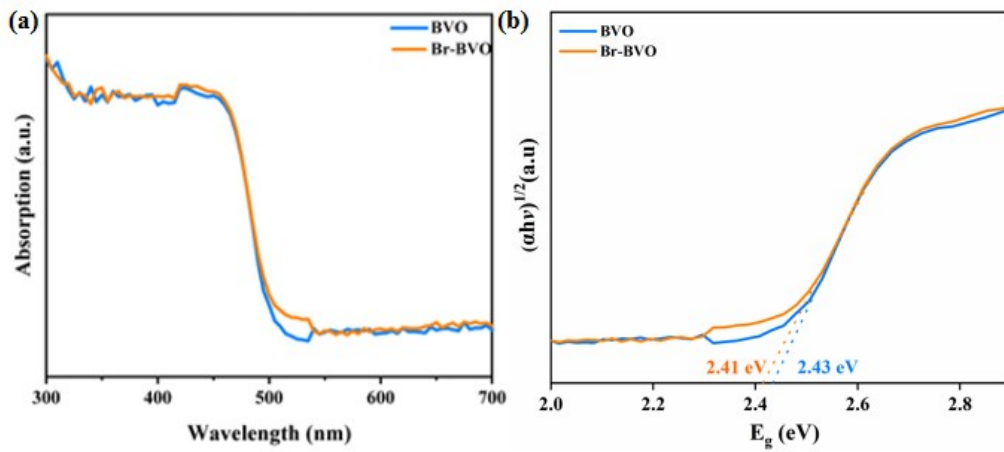

4

5 **Figure S6** (a) UV-vis absorbance spectras and (b) Tauc plots of BVO and Br-BVO  
 6 photoanode.

7 **The band gap of the samples can be determined using the following formula<sup>[8]</sup>:**

$$8 \quad \alpha h\nu = A(h\nu - E_g)^{n/2} \quad (S14)$$

9 Where  $\alpha$ ,  $h$ ,  $\nu$ ,  $A$ ,  $E_g$  and  $n$  are the absorption coefficient, Planck's constant, incident  
 10 light frequency, proportionality constant, band-gap and the characteristic integer,  
 11 respectively. Among them,  $n$  depends on the characteristics of the optical transition in



1 a semiconductor, i.e., direct transition (n=1) or indirect transition (n= 4). BiVO<sub>4</sub>  
 2 pertains to indirect transition and the value of n is 4. The band-gap energy (E<sub>g</sub>) of BiVO<sub>4</sub>  
 3 can thus be estimated from a plot of (αhν)<sup>2</sup> versus photon energy (hν). However, C<sub>x</sub>N<sub>y</sub>  
 4 pertains to direct transition and the value of n is 1. The band-gap energy (E<sub>g</sub>) of C<sub>x</sub>N<sub>y</sub>  
 5 can thus be estimated from a plot of (αhν)<sup>1/2</sup> versus photon energy (hν).

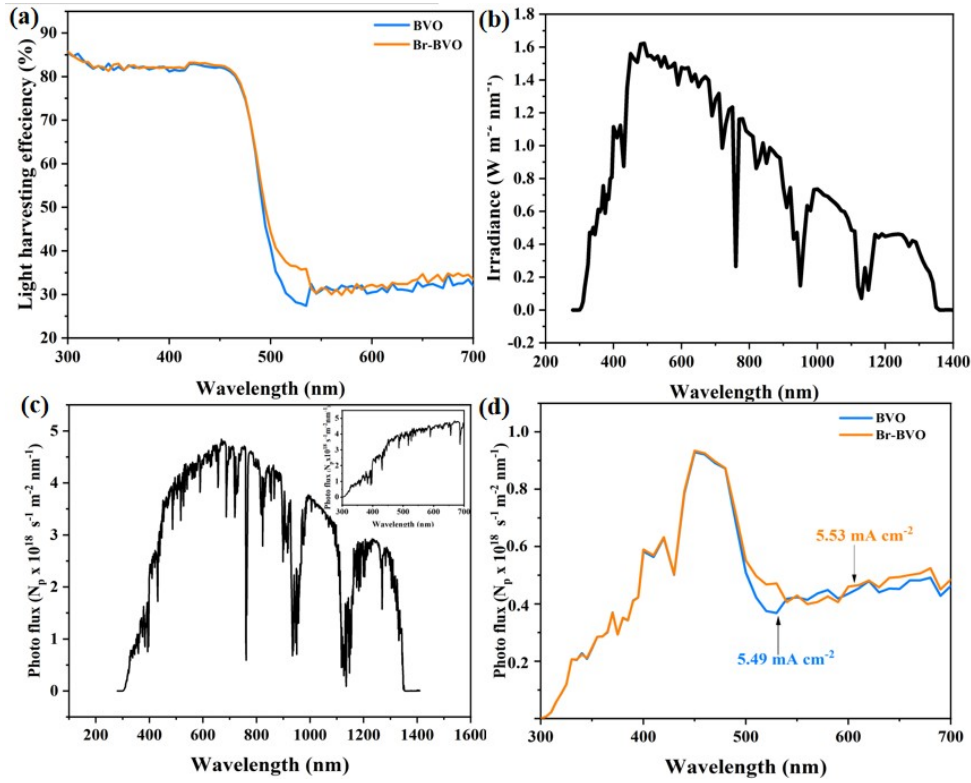

6  
 7 **Figure. S7a: The light harvesting efficiency (LHE) of BVO and Br-BVO**

8 **photoanode.** It can be calculated by the absorbance data  $\eta_{ABS}$  shown in Figure S6a:

9 
$$\eta_{LHE} = (1 - 10^{-\eta_{ABS}}) \times 100\%;$$

10 **Figure. S7b: the solar spectral irradiance** (original data of AM1.5G spectrum,

11 named as (original data of AM 1.5G spectrum, named as “E”);

12 **Figure. S7c: the photo flux** (the number of photons,  $N_p$ ) which is converted from

13 the irradiance data (Figure S7b):  $N_p = E/E_p = E \cdot [(\lambda \cdot 10^{-9}) / (h \cdot c)] = E \cdot \lambda \cdot 10^{-9} / (1.988 \cdot 10^{-25})$

14 
$$= E \cdot \lambda \cdot 5.03 \cdot 10^{15};$$

1 **Figure. S7d: The charges density data ( $J_{\text{abs}}$ )<sup>[9]</sup>. It can be obtained from the**  
 2 product of the photon flux  $N_p$  (Figure S7c)  $\times e \times$  light harvesting efficiency (Figure  
 3 S7a); Where the  $e$  is the electric charges carried by a single electron ( $1.6022 \times 10^{-19}$ ); the  
 4  $J_{\text{max}} \times \eta_{\text{LHE}}$  is the integration of the the photo flux by wavelength (nm). The  $J_{\text{abs}}$   
 5  $= J_{\text{max}} \times \eta_{\text{LHE}}$  of BVO and Br-BVO photoanode was integrated to be 5.49 mA/cm<sup>2</sup> and  
 6 5.53 mA/cm<sup>2</sup>, respectively.

7

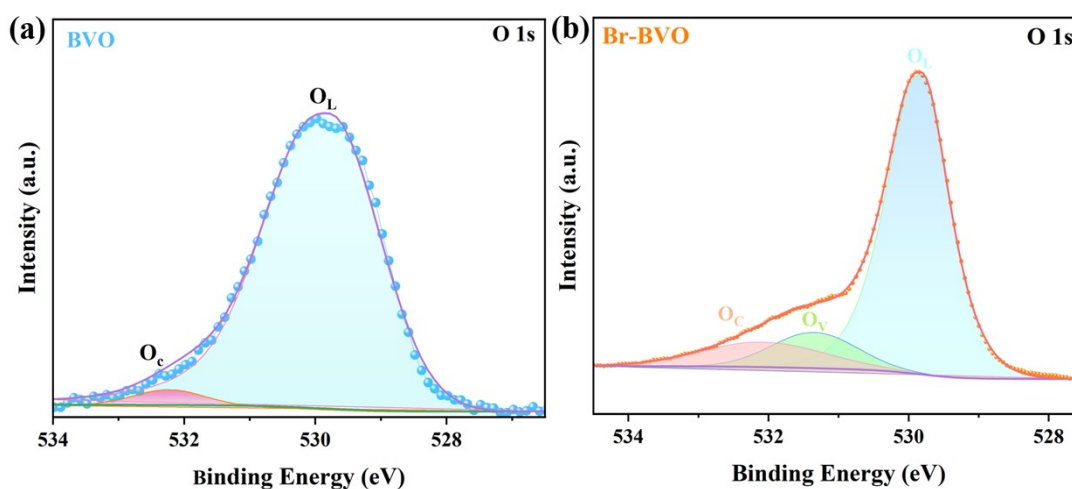

8

9 **Figure S8** the O 1s spectra of (a) BVO and (b) Br-BVO photoanode.

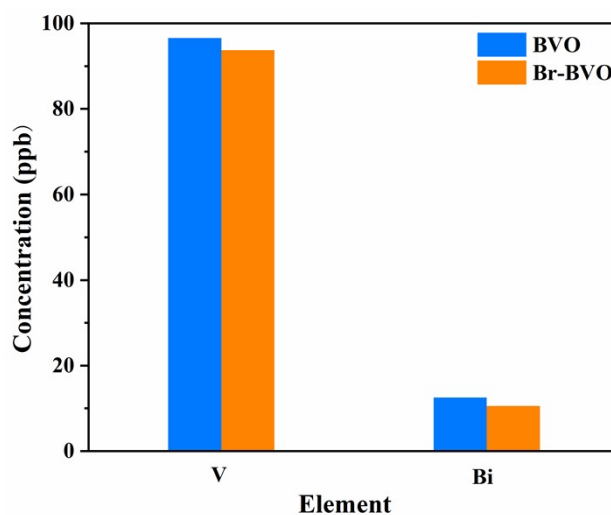

10

11 **Figure S9** ICP analysis after stability test of BVO and Br-BVO photoanode.

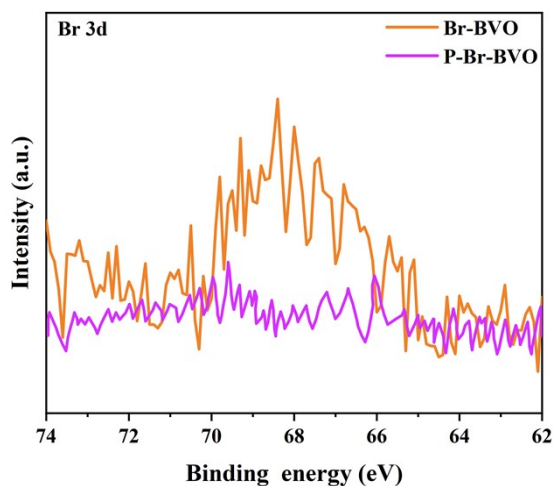

1

2 **Figure S10** Comparison of XPS results of Br-BVO photoanode before and after.

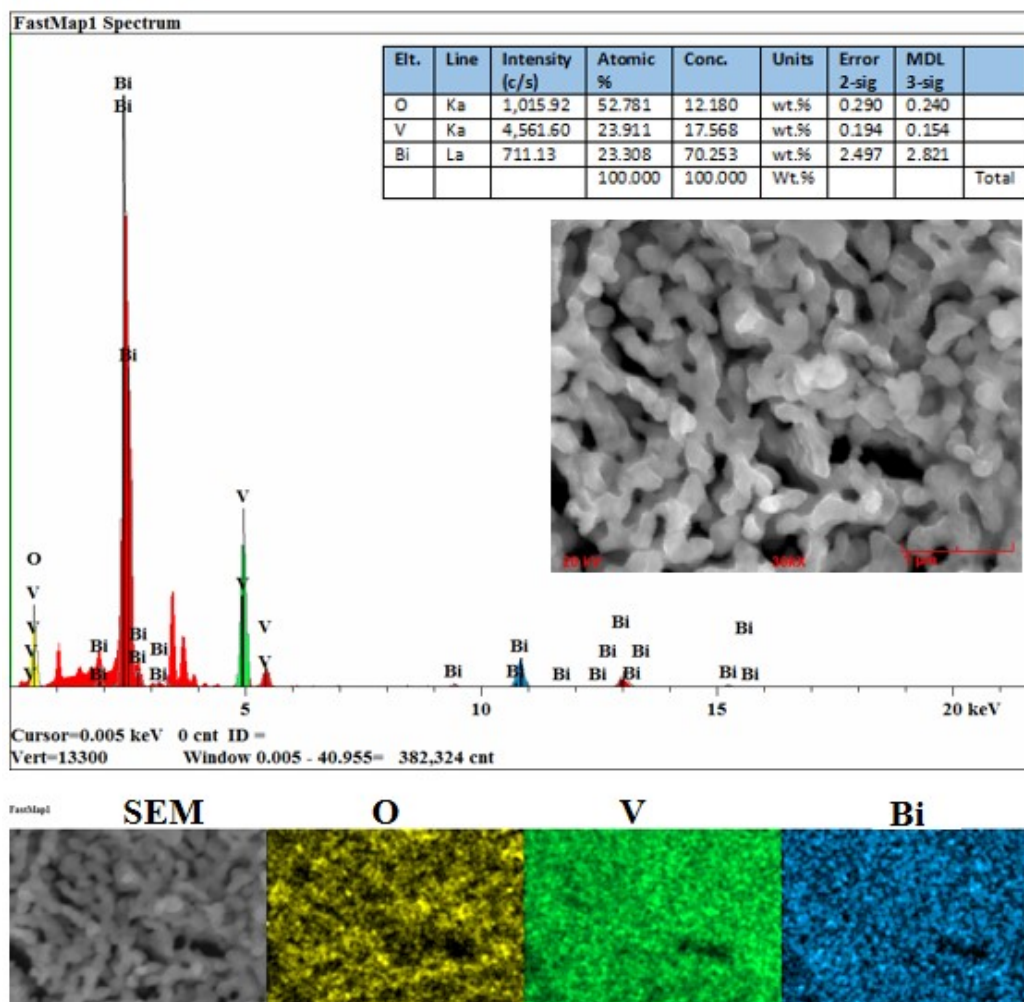

3

4

**Figure.S11** the EDS-mapping after stability test.

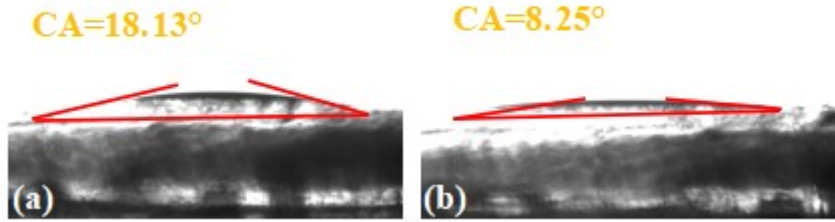

1

2 **Figure S12** The contact angle tests of the BVO (a) and Br-BVO(b) photoanode.

3 **The calculation of the work function ( $\Phi$ ) of  $\text{BiVO}_4$  and  $\text{Br-BiVO}_4$  according to**  
 4 **their UV-vis and UPS spectra<sup>[10]</sup>.**

5  **$\text{BiVO}_4$ :**

6  $E_{\text{Cutoff}}=17.6 \text{ eV}$

7  $\Phi (\text{BiVO}_4) = h\nu - E_{\text{Cutoff}} = 21.22 \text{ eV} - 17.6 \text{ eV} = 3.62 \text{ eV}(\text{S15})$

8

9  **$\text{Br-BiVO}_4$ :**

10  $E_{\text{Cutoff}}=18.1 \text{ eV}$

11  $\Phi (\text{Br-BiVO}_4) = h\nu - E_{\text{Cutoff}} = 21.22 \text{ eV} - 18.1 \text{ eV} = 3.12 \text{ eV}(\text{S16})$

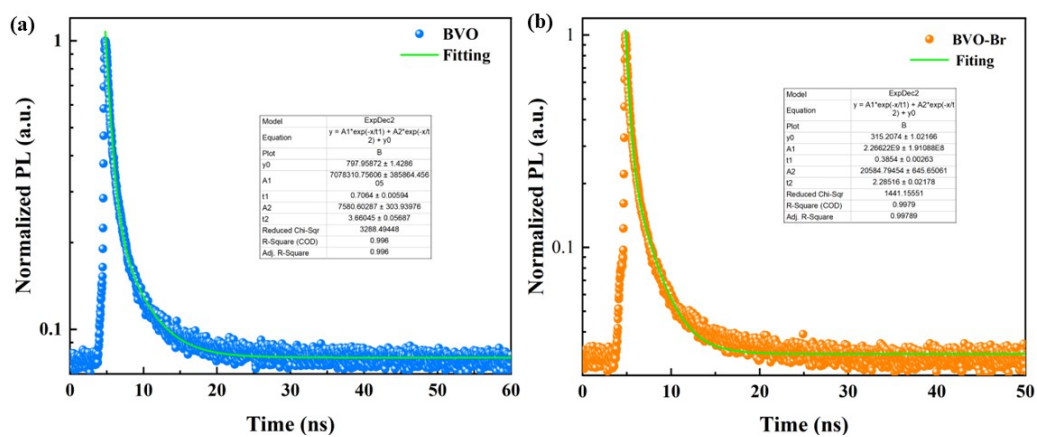

12

13 **Figure S13** (a) TRPL measurements fitting plot of BVO and Br-BVO photoanode.

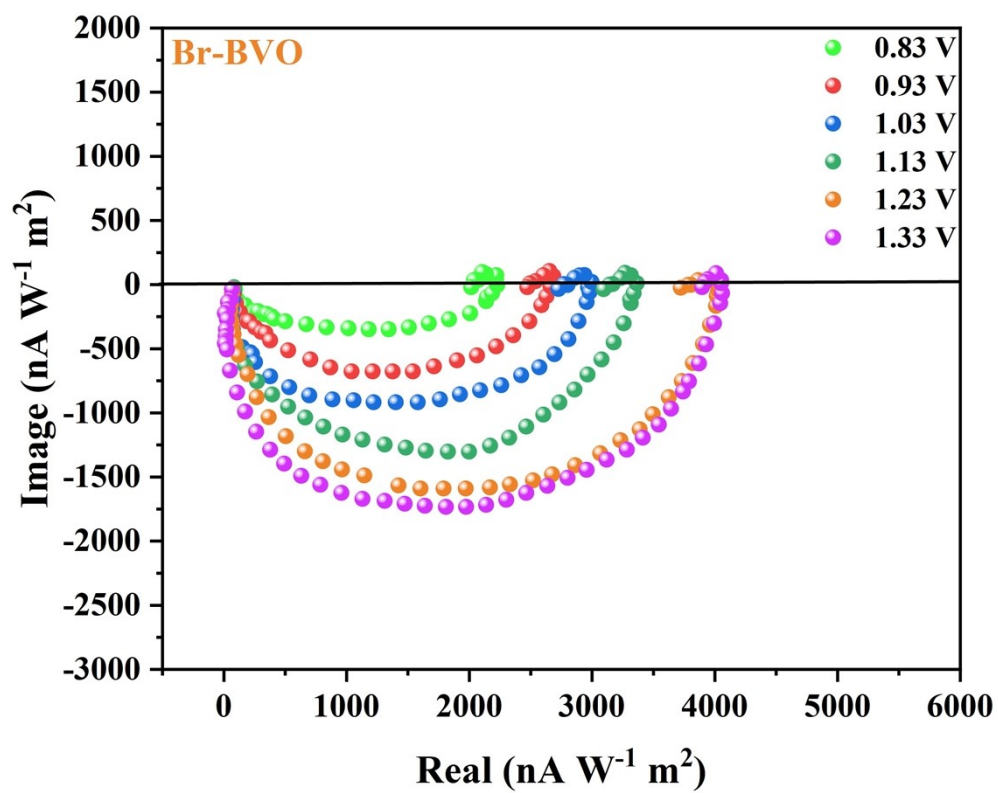

1

2 **Figure S14** The IMPS Nyquist plots of Br-BVO photoanode recorded at different

3 potentials (0.83 V<sub>RHE</sub>-1.33 V<sub>RHE</sub>).

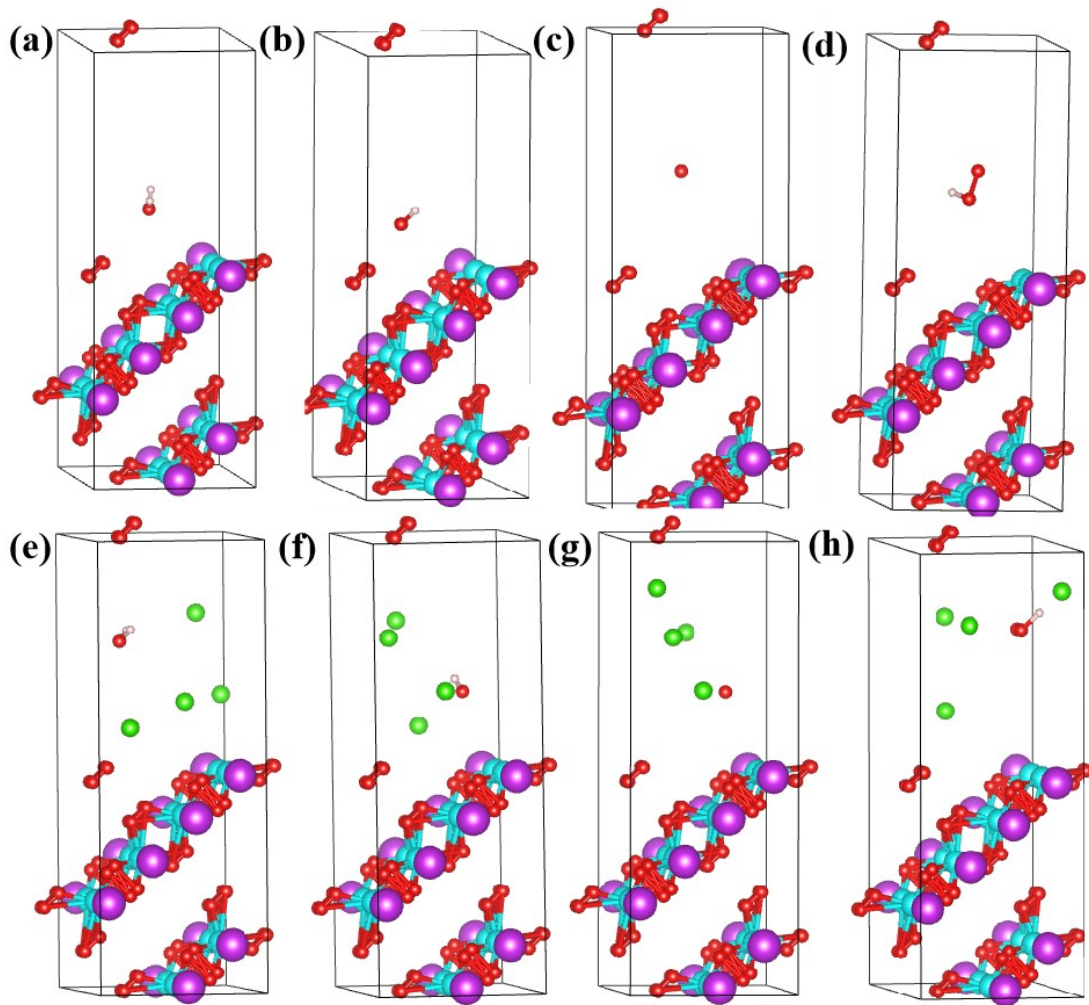

1

2 **Figure S15** Adsorption model of (a)  $\text{H}_2\text{O}$ , (b)  $\text{OH}$ , (c)  $\text{O}$  and (d)  $\text{OOH}$  on BVO

3 photoanode; adsorption model of (e)  $\text{H}_2\text{O}$ , (f)  $\text{OH}$ , (g)  $\text{O}$  and (h)  $\text{OOH}$  on Br-BVO

4 photoanode.

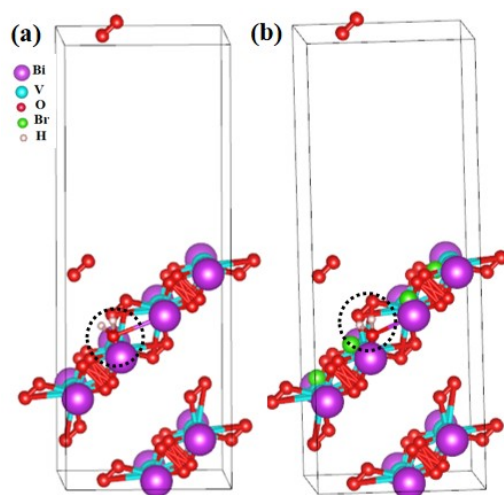

1

2 **Figure S16** The initial DFT calculated adsorption model of the reactant H<sub>2</sub>O on

3 BVO and Br-BVO photoanode.

4

5 **Table S1** The PEC performance of BiVO<sub>4</sub>-based photoanodes without oxygen

6 evolution.

| Material                                                        | the power intensity of the incident light (mW/cm <sup>2</sup> ) | Performance (at 1.23 V <sub>RHE</sub> ) | Ref       |
|-----------------------------------------------------------------|-----------------------------------------------------------------|-----------------------------------------|-----------|
| <b>Br-BiVO<sub>4</sub></b>                                      | 100                                                             | 2.23                                    | This work |
| <b>40-Ag-Pi/BiVO<sub>4</sub></b>                                | 100                                                             | 2.32                                    | [11]      |
| <b>BVO-NB-5P</b>                                                | 100                                                             | 1.47                                    | [12]      |
| <b>Ni:BiVO<sub>4</sub></b>                                      | 100                                                             | 1.36                                    | [13]      |
| <b>Au-doped BiVO<sub>4</sub></b>                                | 100                                                             | 0.24                                    | [14]      |
| <b>W (5%)-doped BiVO<sub>4</sub></b>                            | 100                                                             | 0.61                                    | [15]      |
| <b>Controlled nanostructured morphology of BiVO<sub>4</sub></b> | 100                                                             | 1.98                                    | [16]      |
| <b>S-BVO</b>                                                    | 100                                                             | 1.80                                    | [17]      |
| <b>F-BVO</b>                                                    | 100                                                             | 0.28                                    | [18]      |
| <b>oxygen vacancies BVO</b>                                     | 100                                                             | 2.00                                    | [19]      |

7

1 **Table S2** Impedance parameters obtained from EIS plots

| <b>Sample</b> | <b><math>R_s/\Omega</math></b><br><b>(Error/%)</b> | <b><math>R_{ct}/\Omega</math></b><br><b>(Error/%)</b> | <b>CPE/F</b><br><b>(Error/%)</b> |
|---------------|----------------------------------------------------|-------------------------------------------------------|----------------------------------|
| <b>BVO</b>    | 8.47 (0.89)                                        | 138.9 (2.40)                                          | 9.689E-5 (3.97)                  |
| <b>Br-BVO</b> | 7.92 (1.02)                                        | 254.1 (3.13)                                          | 1.98E-4 (4.19)                   |

2



## 1 References

- 2 [1] P. Luan, X. Zhang, Y. Zhang, Z. Li, U. Bach, J.J.C. Zhang, Dual Quantum  
3 Dot-Decorated Bismuth Vanadate Photoanodes for Highly Efficient Solar Water  
4 Oxidation, *ChemSusChem*, 12 (2019) 1240-1245.
- 5 [2] X. Huai, L. Girardi, R. Lu, S. Gao, Y. Zhao, Y. Ling, G.A. Rizzi, G. Granozzi,  
6 Z.J.N.E. Zhang, The mechanism of concentric  $\text{HfO}_2/\text{Co}_3\text{O}_4/\text{TiO}_2$  nanotubes  
7 investigated by intensity modulated photocurrent spectroscopy (IMPS) and  
8 electrochemical impedance spectroscopy (EIS) for photoelectrochemical activity, *Nano*  
9 *Energy*, 65 (2019) 104020.
- 10 [3] G. Kresse, J.J.P.r.B. Furthmüller, Efficient iterative schemes for ab initio total-  
11 energy calculations using a plane-wave basis set, *Phys. Rev. B*, 54 (1996) 11169.
- 12 [4] J.P.J.P.R.L. Perdew, k. Burke, m. ernzerhof, 77 (1996) 3865.
- 13 [5] S.J.J.o.c.c. Grimme, Semiempirical GGA-type density functional constructed with  
14 a long-range dispersion correction, *J Comput Chem.*, 27 (2006) 1787-1799.
- 15 [6] Y. Jia, L. Zhang, A. Du, G. Gao, J. Chen, X. Yan, C.L. Brown, X.J.A.m. Yao, Defect  
16 graphene as a trifunctional catalyst for electrochemical reactions, *Adv. Mater.*, 28  
17 (2016) 9532-9538.
- 18 [7] Á. Valdés, Z.W. Qu, G.J. Kroes, J. Rossmeisl, J.K. Nørskov, Oxidation and Photo-  
19 Oxidation of Water on  $\text{TiO}_2$  Surface, *J. Phys. Chem. C*, 112 (2008) 9872-9879.
- 20 [8] K.-H. Ye, Z. Wang, J. Gu, S. Xiao, Y. Yuan, Y. Zhu, Y. Zhang, W. Mai, S. Yang,  
21 Carbon quantum dots as a visible light sensitizer to significantly increase the solar water  
22 splitting performance of bismuth vanadate photoanodes, *Energ. Environ. Sci.*, 10

1 (2017) 772-779.

2 [9] X. Shi, I.Y. Choi, K. Zhang, J. Kwon, D.Y. Kim, J.K. Lee, S.H. Oh, J.K. Kim, J.H.  
3 Park, Efficient photoelectrochemical hydrogen production from bismuth vanadate-  
4 decorated tungsten trioxide helix nanostructures, *Nat. Commun.*, 5 (2014) 4775.

5 [10] L.J. Wang, J.Y. Bai, Y.J. Zhang, F. Mao, Y. Liu, H. Yuan, P.F. Liu, H.G. Yang,  
6 Controllable synthesis of conical BiVO<sub>4</sub> for photocatalytic water oxidation, *J. Mater.*  
7 *Chem. A*, 8 (2020) 2331-2335.

8 [11] Y. Gao, X. Li, J. Hu, W. Fan, F. Wang, D. Xu, J. Ding, H. Bai, W. Shi, Ag-  
9 Pi/BiVO<sub>4</sub> heterojunction with efficient interface carrier transport for  
10 photoelectrochemical water splitting, *J Colloid Interf. Sci*, 579 (2020) 619-627.

11 [12] K. Xue, H. Zhu, X. Zhao, L.A. Rodrigues, D.A. Reddy, Y. Zhang, L. Yu, Ni<sub>3</sub>B  
12 modified BiVO<sub>4</sub> photoanodes for enhanced photoelectrochemical water splitting: The  
13 key role of Ni<sub>3</sub>B on reducing the water oxidation barrier, *Nano Res.*, 16 (2023) 12043-  
14 12049.

15 [13] S. Saxena, A. Verma, K. Asha, N.K. Biswas, A. Banerjee, V.R. Satsangi, R.  
16 Shrivastav, S. Dass, Nanostructured Ni:BiVO<sub>4</sub> photoanode in photoelectrochemical  
17 water splitting for hydrogen generation, *Int. J Hydrogen Energ.*, 45 (2020) 26746-  
18 26757.

19 [14] C. Venkata Reddy, I. Neelakanta Reddy, K. Ravindranadh, K. Raghava Reddy, J.  
20 Shim, B. Cheolho, Au-doped BiVO<sub>4</sub> nanostructure-based photoanode with enhanced  
21 photoelectrochemical solar water splitting and electrochemical energy storage ability,  
22 *Appl. Surf. Sci.* , 545 (2021).

- 1 [15] L. Zhao, J. Wei, Y. Li, C. Han, L. Pan, Z. Liu, Photoelectrochemical performance  
2 of W-doped BiVO<sub>4</sub> photoanode, Journal of Materials Science: Materials in Electronics,  
3 J Mater Sci-Mater El., 30 (2019) 21425-21434.
- 4 [16] N.G. Deshpande, C.H. Ahn, R.R. Koli, A.S. Jamadar, D.S. Kim, Y.B. Kim, S.H.  
5 Jung, H.K. Cho, Controlled nanostructured morphology of BiVO<sub>4</sub> photoanodes for  
6 efficient on-demand catalysis in solar water-splitting and sustainable water-treatment,  
7 Appl. Surf. Sci., 514 (2020).
- 8 [17] M. Rohloff, B. Anke, O. Kasian, S. Zhang, M. Lerch, C. Scheu, A. Fischer,  
9 Enhanced Photoelectrochemical Water Oxidation Performance by Fluorine  
10 Incorporation in BiVO<sub>4</sub> and Mo:BiVO<sub>4</sub> Thin Film Photoanodes, ACS Appl. Mater.  
11 Interface, 11 (2019) 16430-16442.
- 12 [18] S. Wang, T. He, P. Chen, A. Du, K. Ostrikov, W. Huang, L. Wang, In Situ  
13 Formation of Oxygen Vacancies Achieving Near-Complete Charge Separation in  
14 Planar BiVO<sub>4</sub> Photoanodes, Adv. Mater., 32 (2020) 2001385.
- 15 [19] X. Yin, J. Li, L. Du, F. Zhan, K. Kawashima, W. Li, W. Qiu, Y. Liu, X. Yang, K.  
16 Wang, Y. Ning, C.B. Mullins, Boosting Photoelectrochemical Performance of BiVO<sub>4</sub>  
17 through Photoassisted Self-Reduction, ACS Appl. Energy Mater., 3 (2020) 4403-4410.
